# Supplementary material for: Hexagonal boron nitride induces anion trapping in a polyethylene oxide based solid polymer electrolyte for lithium dendrite inhibition
Source: Royal Society of Chemistry journal article supplement (doi:10.1039/d0ta03677c), 2020-01-01
Supplement: d0ta03677c1.pdf [file d0ta03677c1.pdf]

## Supporting Information

### **Hexagonal boron nitride inducing anionic trapping in polyethylene oxide based solid polymer electrolyte for lithium dendrite inhibition**

Yuhan Li,<sup>a</sup> Libo Zhang,<sup>a</sup> Zongjie Sun,<sup>a</sup> Guoxin Gao,<sup>a\*</sup> Shiyao Lu,<sup>a</sup> Min Zhu,<sup>a</sup> Yanfeng Zhang,<sup>a</sup> Zhiyu Jia,<sup>b</sup> Chunhui Xiao,<sup>a</sup> Huaitian Bu,<sup>c</sup> Kai Xi,<sup>d</sup> Shujiang Ding<sup>a\*</sup>

<sup>a</sup> Department of Applied Chemistry, School of Science, Xi'an Key Laboratory of Sustainable Energy Materials Chemistry, MOE Key Laboratory for Nonequilibrium Synthesis and Modulation of Condensed Matter, State Key Laboratory of Electrical Insulation and Power Equipment, Xi'an Jiaotong University, Xi'an 710049, China.

<sup>b</sup> MOE Key Laboratory of Cluster Science, School of Chemistry and Chemical Engineering, Beijing Institute of Technology, Beijing 100081, China.

<sup>c</sup> Department of Materials and Nanotechnology, SINTEF Industry, Forskningsveien 1, 0373 Oslo, Norway.

<sup>d</sup> University of Cambridge, Department of Materials Science and Metallurgy.

Email: gaoguoxin@mail.xjtu.edu.cn; [dingsj@mail.xjtu.edu.cn](mailto:dingsj@mail.xjtu.edu.cn)

Keywords: Hexagonal boron nitride, polymer solid electrolyte, ion transport mechanism, Li dendrites inhibition, DFT and MD.

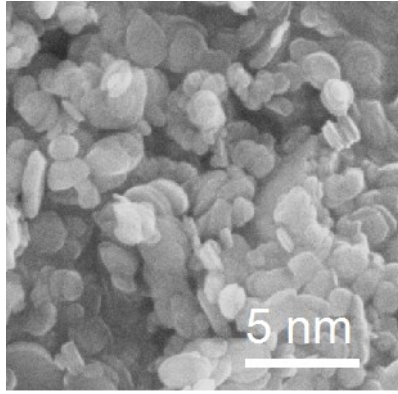

**Fig. S1** The SEM image of h-BN nanosheets.

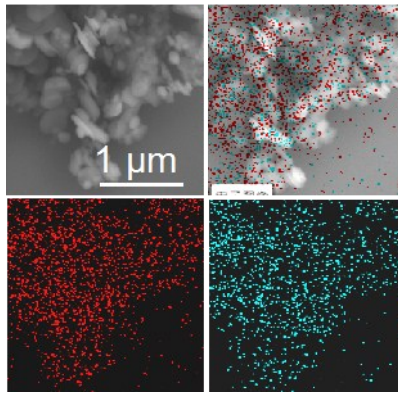

**Fig. S2** Elemental mapping images of h-BN nanosheets.

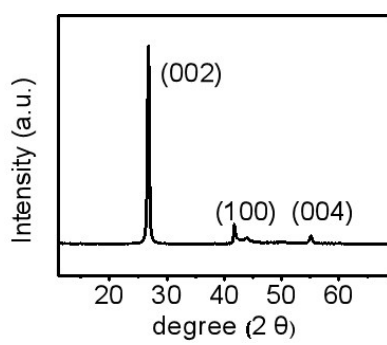

**Fig. S3** XRD spectra of h-BN.

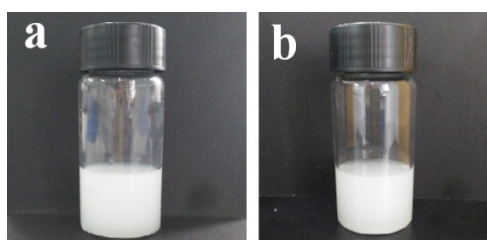

**Fig. S4** (a) Photograph of h-BN nanosheets dissolving in acetonitrile. (b) The picture of the homogeneous electrolyte solution of h-BN, PEO and LiTFSI in acetonitrile.

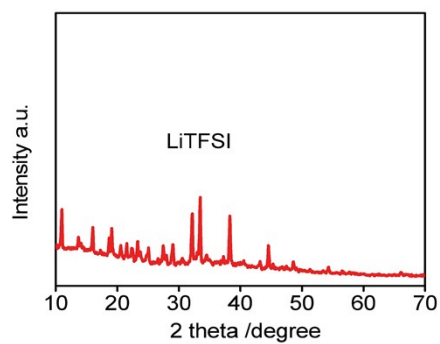

**Fig. S5** XRD of LiTFSI. The peaks at  $11.04^\circ$ ,  $16.03^\circ$ ,  $19.09^\circ$ ,  $20.55^\circ$ ,  $21.54^\circ$ ,  $23.32^\circ$ ,  $25.07^\circ$ ,  $27.4^\circ$ ,  $29.03^\circ$ ,  $32.20^\circ$ ,  $33.48^\circ$ ,  $38.30^\circ$  and  $44.54^\circ$  perfectly match to (002), (011), (201), (111), (202), (013), (113), (212), (114), (015), (115), (116) and (125) crystal planes.

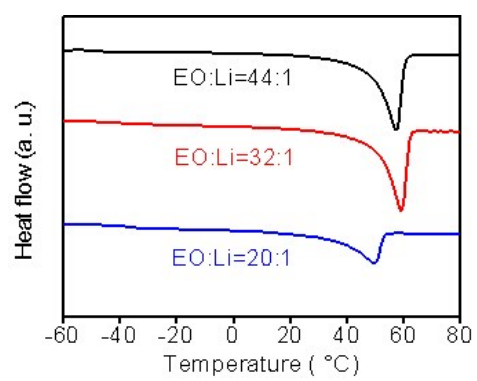

**Fig. S6** The  $T_m$  of PEO/LiTFSI/6%-h-BN with different EO: Li = 20, 32, 44.

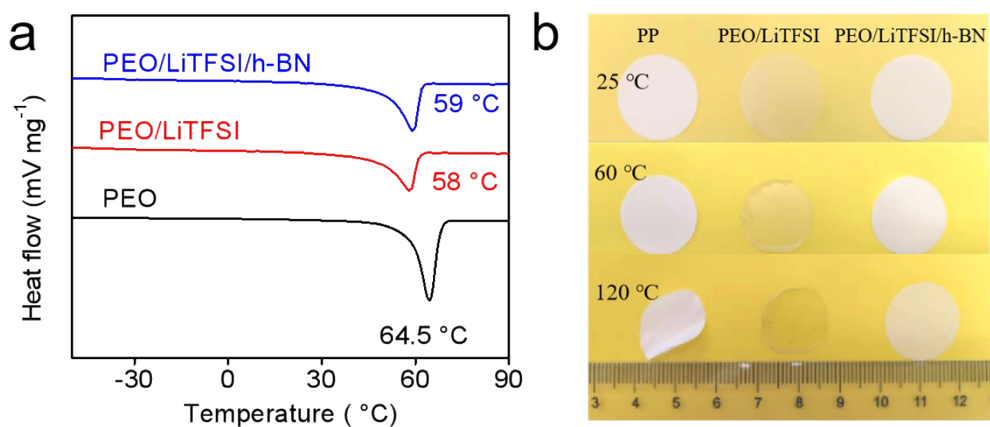

**Fig. S7** (a) The  $T_m$  of PEO, PEO/LiTFSI and PEO/LiTFSI/x=h-BN ( $x= 3\%$ ,  $6\%$  and  $9\%$ ) CPE. (b) Fourier-transform infrared spectra (FTIR) of h-BN, PEO, PEO/LiTFSI and PEO/LiTFSI/x=h-BN ( $x= 3\%$ ,  $6\%$  and  $9\%$ ) CPE.



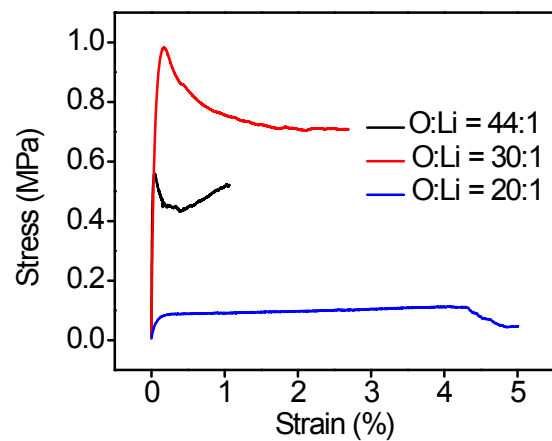

**Fig. S8** The stress-strain curves of PEO/LiTFSI/6% h-BN with different EO: Li = 20:1, 32:1, 44:1.

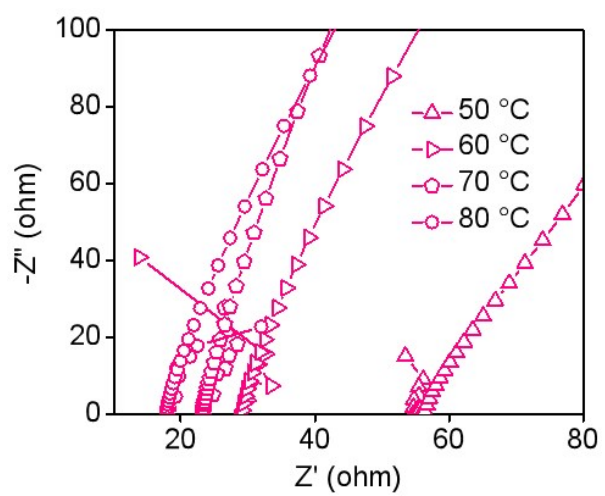

**Fig. S9** The EIS plots for PEO/LiTFSI SPE under 50-80 °C.

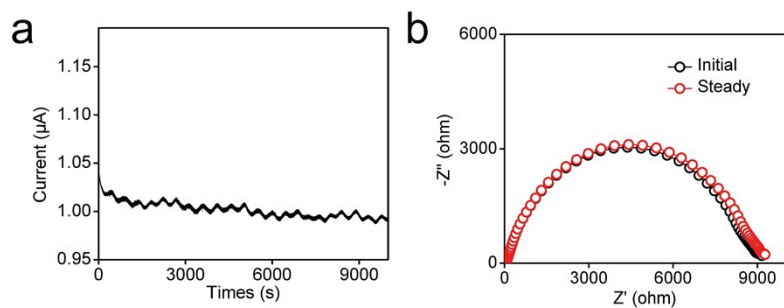

**Fig. S10** (a) I-t curve for PEO/LiTFSI SPE at 60 °C with polarization voltage of 10 mV. (b) The A. C impedance plots before and after the polarization.

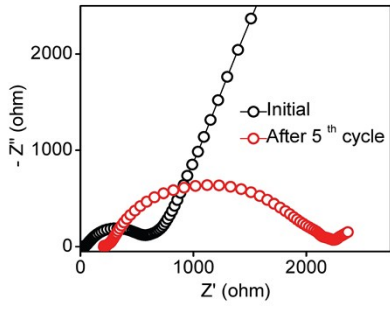

**Fig. S11** Impedance spectra of the Li/PEO/LiTFSI SPE/LiFePO<sub>4</sub> cell before and after 5 cycles at 60 °C.

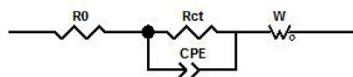

**Fig. S12** The equivalent circuit of Li/PEO/LiTFSI SPE/LiFePO<sub>4</sub> and Li/PEO/LiTFSI/h-BN CPE/LiFePO<sub>4</sub> cell at 60 °C.

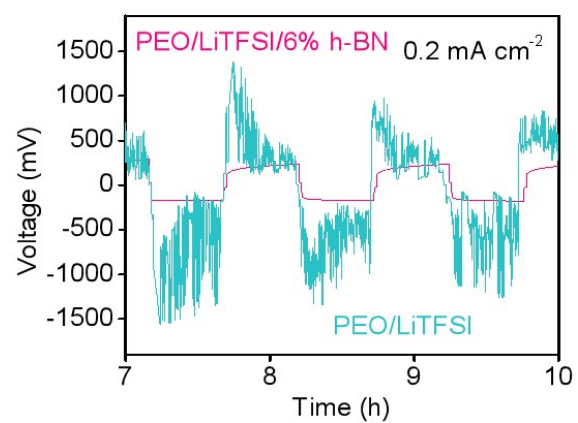

**Fig. S13** The magnified cycling curves of battery using PEO/LiTFSI/h-BN CPE and PEO/LiTFSI SPE for selected cycles.

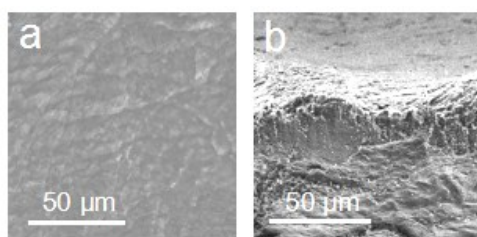

**Fig. S14** The SEM image (a) and cross-sectional image (b) of Li foil before cycle.

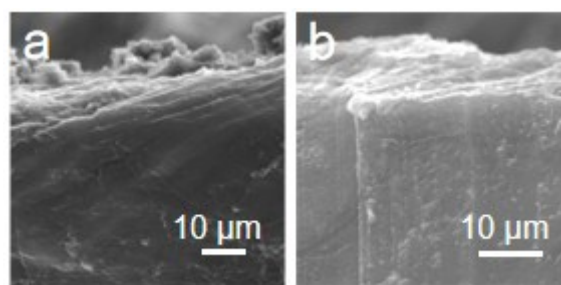

**Fig. S15** The SEM and cross-sectional image of Li anode after cycle in the batteries using PEO/LiTFSI SPE (a) and PEO/LiTFSI/6% h-BN CPE (b).



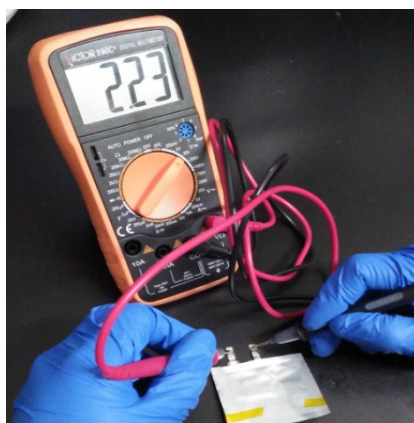

**Fig. S16** Open circuit voltage of the assembled solid-state soft-package lithium metal battery at room temperature.

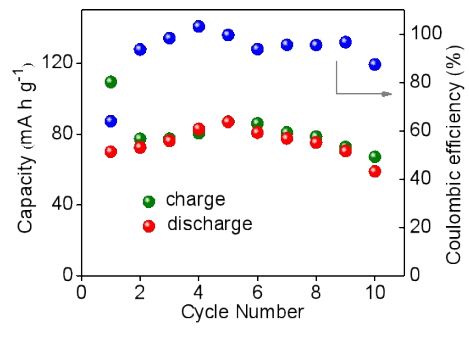

**Fig. S17** Cycle performance of Li/PEO/LiTFSI/6% h-BN/LiFePO<sub>4</sub> soft-package lithium metal battery at 0.1 C and 60 °C.

**Table S1.** The ionic conductivity of PEO/LiTFSI SPE with different contents of h-BN at different temperature.

| $\sigma \times 10^{-4} \text{ S cm}^{-1}$ | PEO/LiTFSI | PEO/LiTFSI/3% h-BN | PEO/LiTFSI/6% h-BN | PEO/LiTFSI/9% h-BN |
|-------------------------------------------|------------|--------------------|--------------------|--------------------|
| 303 K                                     | 0.077      | 0.046              | 0.077              | 0.026              |
| 313 K                                     | 0.204      | 0.125              | 0.191              | 0.042              |
| 323 K                                     | 0.540      | 0.319              | 0.470              | 0.098              |
| 333 K                                     | 0.941      | 0.358              | 0.890              | 0.509              |
| 343 K                                     | 1.47       | 0.608              | 1.11               | 0.623              |
| 353 K                                     | 2.20       | 0.725              | 1.45               | 0.829              |

**Table S2.** The ionic conductivity of PEO/LiTFSI/6%-h-BN with different OE:Li at different temperature.

| $\sigma \times 10^{-4} \text{ S cm}^{-1}$ | PEO/LiTFSI/6%-h-BN |            |            |
|-------------------------------------------|--------------------|------------|------------|
|                                           | EO:Li=20:1         | EO:Li=32:1 | EO:Li=44:1 |
| 303 K                                     | 0.137              | 0.077      | 0.027      |
| 313 K                                     | 0.569              | 0.191      | 0.055      |
| 323 K                                     | 1.257              | 0.470      | 0.155      |
| 333 K                                     | 1.348              | 0.890      | 0.621      |
| 343 K                                     | 1.510              | 1.11       | 0.762      |
| 353 K                                     | 1.520              | 1.45       | 0.929      |

**Table S3.** Comparison of electrochemical cycle performance of Li/PEO/LiTFSI/h-BN CPE/LiFePO<sub>4</sub>

with other reported PEO-based electrolyte.

| Electrolyte                                                | Cycle number | Discharge capacity (cathode material: LiFePO <sub>4</sub> ) | Temperature | Reference                                                 |
|------------------------------------------------------------|--------------|-------------------------------------------------------------|-------------|-----------------------------------------------------------|
| PEO/LiTFSI/h-BN CPE                                        | 140          | 143 mAh g <sup>-1</sup> / 0.2 C                             | 60 °C       | <b>This work</b>                                          |
| Ionic liquid-PEO solid electrolyte                         | 50           | 140 mAh g <sup>-1</sup> / 0.1 C                             | 60 °C       | <i>J. Hydrogen Energy</i> <b>2017</b> , <i>42</i> , 7212. |
| PIL-IL-SiO <sub>2</sub> nanoplates PEO polymer electrolyte | 30           | 145.5 mAh g <sup>-1</sup> / 0.1 C                           | 60 °C       | <i>Nano Energy</i> , <b>2017</b> , <i>33</i> , 110.       |
| PEG-based polymer electrolyte                              | 20           | 140 mAh g <sup>-1</sup> / 0.2 C                             | 30 °C       | <i>Adv. Mater. Interfaces</i> <b>2018</b> , 1801445       |
| PEG-to-PVP triblock gel polymer electrolytes               | 30           | 135 mAh g <sup>-1</sup> / 0.1 C                             | 60 °C       | <i>Polym. Chem.</i> <b>2018</b> , <i>9</i> , 5190         |
| Carbon quantum dots-PEO solid electrolyte                  | 100          | 100 mAh g <sup>-1</sup> / 1 C                               | 60 °C       | <i>Adv. Sci.</i> 2018, 1700996                            |
| pyrrolidone-PEO solid electrolyte                          | --           | --                                                          | --          | <i>Electrochimica Acta</i> <b>2019</b> , <i>293</i> , 25. |

**Table S4.** The corresponding simulated impedance parameters in an equivalent circuit.

| Battery sample     | Before cycle       |                       | After 5 cycles     |                       |
|--------------------|--------------------|-----------------------|--------------------|-----------------------|
|                    | $R_b$ ( $\Omega$ ) | $R_{ct}$ ( $\Omega$ ) | $R_b$ ( $\Omega$ ) | $R_{ct}$ ( $\Omega$ ) |
| PEO/LiTFSI/6% h-BN | 20.94              | 83.34                 | 30.69              | 433.8                 |
| PEO/LiTFSI         | 37.89              | 447.2                 | 178.2              | 1651                  |
